# Supplementary material for: Association Between Fluid Balance Trajectories and Prognosis in Patients with Heart Failure and Preserved Ejection Fraction
Source: Research Square preprint supplement (doi:10.21203/rs.3.rs-6956502/v1), 2025-07-23
Supplement: Supplementary file 1 [file c9e3fed4724571fe6d327440.xlsx]

## Sheet: 描述性统计分析
Variables	Total (n = 1089)	1 (n = 344)	2 (n = 256)	3 (n = 261)	4 (n = 228)	P
Demographics
Age(years)	75.0 (65.0, 83.0)	74.5 (64.0,83.0)	75.0 (66.8,82.0)	75.0 (64.0,83.0)	74.0 (66.0,83.0)	0.997
Gender, n(%)						0.063
Female	592 (54.4%)	195 (56.7%)	124 (48.4%)	137 (52.5%)	136 (59.7%)
Male	497 (45.6%)	149 (43.3%)	132 (51.6%)	124 (47.5%)	92 (40.3%)
Weight(kg)	81.8 (68.0, 100.9)	84.2 (68.7,107.9)	84.2 (70.5,101.5)	84.8 (69.8,106.4)	71.1 (60.0,87.1)	<.001
Vital signs
T (℃)	36.7 (36.4, 37.1)	36.7 (36.4,37.0)	36.7 (36.5,37.1)	36.7 (36.4,37.1)	36.7 (36.4,37.1	0.165
HR(bpm)	84.0 (73.0, 98.0)	84.0 (71.0,97.0)	80.5 (75.0,93.0)	85.0 (72.0,98.0)	87.0 (78.0,102.0)	0.003
RR(bpm)	19.0 (15.0, 23.0)	20.0 (16.0,24.0)	16.0 (14.0,20.0)	19.0 (16.0,24.0)	19.0 (16.0,24.0)	<.001
SBP(mmHg)	118.0 (101.0, 136.0)	124.0 (107.0,139.0)	113.0 (97.0,132.3)	124.0 (105.0,140.0)	109.0 (94.0,127.3)	<.001
SpO2(%)	98.0 (95.0, 100.0)	97.0 (94.0,100.0)	100.0 (97.0,100.0)	98.0 (95.0,100.0)	99.0 (94.0,100.0)	<.001
Laboratory indicators
WBC(m/uL)	11.7 (8.3, 16.4)	10.3 (7.5,13.6)	12.2 (8.9,18.2)	11.8 (8.1,16.1)	12.8 (9.2,18.3)	<.001
PLT(K/uL)	183.0 (130.0, 241.0)	188.0 (136.8,262.3)	155.5 (119.0,202.0)	195.0 (144.0,257.0)	183.0 (124.8,244.0)	<.001
Hb(g/dL)	9.8 (8.4, 11.4)	9.9 (8.5,11.5)	9.4 (8.2,10.9)	10.0 (8.7,11.8)	9.6 (8.1,11.1)	0.002
RDW (%)	15.2 (14.1, 16.8)	15.4 (14.3,17.2)	14.7 (13.7,16.0)	15.3 (14.3,16.9)	15.1 (14.0,16.8)	<.001
Na(mEq/L)	139.0 (136.0, 141.0)	139.0 (136.0,141.0)	139.0 (136.0,141.0)	138.0 (135.0,141.0)	139.0 (135.0,141.0)	0.399
K(mEq/L)	4.2 (3.8, 4.6)	4.1 (3.7,4.5)	4.3 (3.9,4.7)	4.2 (3.8,4.6)	4.2 (3.8,4.7)	0.028
Ca(mg/dL)	8.3 (7.9, 8.8)	8.5 (8.1,8.9)	8.3 (7.9,8.7)	8.3 (7.9,8.8)	8.0 (7.5,8.6)	<.001
GLU(mg/dL)	130.0 (107.0, 158.0)	130.0 (109.8,163.0)	129.5 (107.0,153.5)	130.0 (107.0,158.0)	126.0 (102.8,153.0)	0.158
AG(mEq/L))	14.0 (12.0, 17.0)	14.0 (12.0,17.0)	12.0 (11.0,15.3)	15.0 (13.0,18.0)	14.0 (12.0,18.0)	<.001
Cr(mg/dL)	1.2 (0.8, 1.6)	1.2 (0.9,1.6)	1.0 (0.8,1.4)	1.2 (0.9,1.7)	1.2 (0.7,1.8)	<.001
PT(sec)	14.9 (13.1, 16.7)	14.2 (12.7,15.9)	15.1 (13.8,16.8)	14.2 (12.6,15.9)	15.1 (13.8,17.1)	<.001
APTT(sec)	33.2 (28.3, 38.1)	32.6 (27.9,38.0)	32.8 (28.8,38.2)	32.6 (27.6,37.4)	33.2 (29.9,38.4)	0.073
pH(units)	7.39 (7.32, 7.44)	7.39 (7.33,7.44)	7.39 (7.34,7.43)	7.38 (7.31,7.44)	7.38 (7.29,7.44)	0.063
PaCO2(mmHg)	42.0 (36.0, 49.0)	42.0 (38.0,51.0)	42.0 (36.8,47.0)	42.0 (37.0,50.0)	40.0 (34.0,46.0)	<.001
PaO2(mmHg)	101.0 (64.0, 265.0)	84.0 (60.0,137.3)	254.5 (93.8,344.5)	86.0 (59.0,147.0)	109.0 (63.5,277.8)	<.001
Lac(mmol/L))	1.6 (1.2, 2.2)	1.4 (1.1,1.9)	1.9 (1.5,2.7)	1.5 (1.1,1.8)	1.7 (1.3,2.6)	<.001
Comorbidities
AMI, n(%)	146 (13.4%)	37 (10.8%)	32 (12.5%)	36 (13.8%)	41 (18.0%)	0.093
AFib, n(%)	617 (56.7%)	189 (55.0%)	162 (63.3%)	140 (53.6%)	126 (55.3%)	0.105
HTN, n(%)	816 (75.0%)	268 (77.9%)	183 (71.5%)	203 (77.8%)	162 (71.1%)	0.103
DM, n(%)	447 (41.1%)	150 (43.6%)	112 (43.8%)	117 (44.8%)	68 (29.8%)	0.002
HLP, n(%)	521 (47.8%)	165 (48.0%)	146 (57.0%)	126 (48.3%)	84 (36.8%)	<.001
COPD, n(%)	98 (9.0%)	35 (10.2%)	23 (9.0%)	27 (10.3%)	13 (5.7%)	0.242
PNA, n(%)	350 (32.1%)	116 (33.7%)	55 (21.5%)	94 (36.0%)	85 (37.3%)	<.001
CKD, n(%)	378 (34.7%)	116 (33.7%)	81 (31.6%)	108 (41.4%)	73 (32.0%)	0.070
Drugs
ACEI ARB, n(%)	305 (28.0%)	98 (28.5%)	100 (39.1%)	68 (26.1%)	39 (17.1%)	<.001
Beta Blocker, n(%)	868 (79.7%)	275 (79.9%)	218 (85.2%)	191 (73.2%)	184 (80.7%)	0.008
Furosemide, n(%)	987 (90.6%)	327 (95.1%)	246 (96.1%)	217 (83.1%)	197 (86.4%)	<.001
Spironolactone, n(%)	93 (8.5%)	40 (11.6%)	19 (7.4%)	15 (5.8%)	19 (8.3%)	0.065
Dobutamine, n(%)	44 (4.0%)	12 (3.5%)	11 (4.3%)	7 (2.7%)	14 (6.1%)	0.246
Dopamine, n(%)	96 (8.8%)	24 (7.0%)	21 (8.2%)	28 (10.7%)	23 (10.1%)	0.360
Epinephrine, n(%)	132 (12.1%)	20 (5.8%)	57 (22.3%)	13 (5.0%)	42 (18.4%)	<.001
Norepinephrine, n(%)	452 (41.5%)	89 (25.9%)	94 (36.7%)	112 (42.9%)	157 (68.9%)	<.001
Phenylephrine, n(%)	441 (40.5%)	81 (23.6%)	141 (55.1%)	89 (34.1%)	130 (57.0%)	<.001
Other indicators
Ventilation, n(%)	1062 (97.5%)	339 (98.6%)	251 (98.1%)	248 (95.0%)	224 (98.3%)	0.029
CRRT, n(%)	101 (9.3%)	11 (3.2%)	4 (1.6%)	40 (15.3%)	46 (20.2%)	<.001
Sepsis, n(%)	855 (78.5%)	258 (75.0%)	178 (69.5%)	214 (82.0)	205 (90.0)	<.001
AKI, n(%)	1044 (95.9%)	321 (93.3%)	244 (95.3%)	259 (99.2%)	220 (96.5%)	0.004
SOFA	6.0 (4.0, 9.0)	5.0 (3.0,7.0)	6.0 (4.0,9.0)	6.0 (4.0,9.0)	8.0 (4.0,10.0)	<.001
Charlson	7.00 (5.0, 8.0)	7.00 (5.0,8.0)	6.00 (5.0,8.0)	7.00 (5.0,9.0)	6.00 (5.0,8.0)	0.056

## Sheet: Sheet1
​Table1. Baseline Characteristics of HFpEF Patients with Different Fluid Balance Trajectory Groups
Variables	Total (n = 1089)	1 (n = 344)	2 (n = 256)	3 (n = 261)	4 (n = 228)	P
Demographics
Age(years)	75.0 (65.0, 83.0)	74.5 (64.0,83.0)	75.0 (66.8,82.0)	75.0 (64.0,83.0)	74.0 (66.0,83.0)	0.997
Gender						0.063
Female	592 (54.4%)	195 (56.7%)	124 (48.4%)	137 (52.5%)	136 (59.7%)
Male	497 (45.6%)	149 (43.3%)	132 (51.6%)	124 (47.5%)	92 (40.3%)
Weight(kg)	81.8 (68.0, 100.9)	84.2 (68.7,107.9)	84.2 (70.5,101.5)	84.8 (69.8,106.4)	71.1 (60.0,87.1)	<.001
Vital signs
T (℃)	36.7 (36.4, 37.1)	36.7 (36.4,37.0)	36.7 (36.5,37.1)	36.7 (36.4,37.1)	36.7 (36.4,37.1	0.165
HR(bpm)	84.0 (73.0, 98.0)	84.0 (71.0,97.0)	80.5 (75.0,93.0)	85.0 (72.0,98.0)	87.0 (78.0,102.0)	0.003
RR(bpm)	19.0 (15.0, 23.0)	20.0 (16.0,24.0)	16.0 (14.0,20.0)	19.0 (16.0,24.0)	19.0 (16.0,24.0)	<.001
SBP(mmHg)	118.0 (101.0, 136.0)	124.0 (107.0,139.0)	113.0 (97.0,132.3)	124.0 (105.0,140.0)	109.0 (94.0,127.3)	<.001
SpO2(%)	98.0 (95.0, 100.0)	97.0 (94.0,100.0)	100.0 (97.0,100.0)	98.0 (95.0,100.0)	99.0 (94.0,100.0)	<.001
Laboratory indicators
WBC(m/uL)	11.7 (8.3, 16.4)	10.3 (7.5,13.6)	12.2 (8.9,18.2)	11.8 (8.1,16.1)	12.8 (9.2,18.3)	<.001
PLT(K/uL)	183.0 (130.0, 241.0)	188.0 (136.8,262.3)	155.5 (119.0,202.0)	195.0 (144.0,257.0)	183.0 (124.8,244.0)	<.001
Hb(g/dL)	9.8 (8.4, 11.4)	9.9 (8.5,11.5)	9.4 (8.2,10.9)	10.0 (8.7,11.8)	9.6 (8.1,11.1)	0.002
RDW (%)	15.2 (14.1, 16.8)	15.4 (14.3,17.2)	14.7 (13.7,16.0)	15.3 (14.3,16.9)	15.1 (14.0,16.8)	<.001
Na(mEq/L)	139.0 (136.0, 141.0)	139.0 (136.0,141.0)	139.0 (136.0,141.0)	138.0 (135.0,141.0)	139.0 (135.0,141.0)	0.399
K(mEq/L)	4.2 (3.8, 4.6)	4.1 (3.7,4.5)	4.3 (3.9,4.7)	4.2 (3.8,4.6)	4.2 (3.8,4.7)	0.028
Ca(mg/dL)	8.3 (7.9, 8.8)	8.5 (8.1,8.9)	8.3 (7.9,8.7)	8.3 (7.9,8.8)	8.0 (7.5,8.6)	<.001
GLU(mg/dL)	130.0 (107.0, 158.0)	130.0 (109.8,163.0)	129.5 (107.0,153.5)	130.0 (107.0,158.0)	126.0 (102.8,153.0)	0.158
AG(mEq/L))	14.0 (12.0, 17.0)	14.0 (12.0,17.0)	12.0 (11.0,15.3)	15.0 (13.0,18.0)	14.0 (12.0,18.0)	<.001
Cr(mg/dL)	1.2 (0.8, 1.6)	1.2 (0.9,1.6)	1.0 (0.8,1.4)	1.2 (0.9,1.7)	1.2 (0.7,1.8)	<.001
PT(sec)	14.9 (13.1, 16.7)	14.2 (12.7,15.9)	15.1 (13.8,16.8)	14.2 (12.6,15.9)	15.1 (13.8,17.1)	<.001
APTT(sec)	33.2 (28.3, 38.1)	32.6 (27.9,38.0)	32.8 (28.8,38.2)	32.6 (27.6,37.4)	33.2 (29.9,38.4)	0.073
pH(units)	7.39 (7.32, 7.44)	7.39 (7.33,7.44)	7.39 (7.34,7.43)	7.38 (7.31,7.44)	7.38 (7.29,7.44)	0.063
PaCO2(mmHg)	42.0 (36.0, 49.0)	42.0 (38.0,51.0)	42.0 (36.8,47.0)	42.0 (37.0,50.0)	40.0 (34.0,46.0)	<.001
PaO2(mmHg)	101.0 (64.0, 265.0)	84.0 (60.0,137.3)	254.5 (93.8,344.5)	86.0 (59.0,147.0)	109.0 (63.5,277.8)	<.001
Lac(mmol/L))	1.6 (1.2, 2.2)	1.4 (1.1,1.9)	1.9 (1.5,2.7)	1.5 (1.1,1.8)	1.7 (1.3,2.6)	<.001
Comorbidities
AMI	146 (13.4%)	37 (10.8%)	32 (12.5%)	36 (13.8%)	41 (18.0%)	0.093
Afib	617 (56.7%)	189 (55.0%)	162 (63.3%)	140 (53.6%)	126 (55.3%)	0.105
HTN	816 (75.0%)	268 (77.9%)	183 (71.5%)	203 (77.8%)	162 (71.1%)	0.103
DM	447 (41.1%)	150 (43.6%)	112 (43.8%)	117 (44.8%)	68 (29.8%)	0.002
HLP	521 (47.8%)	165 (48.0%)	146 (57.0%)	126 (48.3%)	84 (36.8%)	<.001
COPD	98 (9.0%)	35 (10.2%)	23 (9.0%)	27 (10.3%)	13 (5.7%)	0.242
PNA	350 (32.1%)	116 (33.7%)	55 (21.5%)	94 (36.0%)	85 (37.3%)	<.001
CKD	378 (34.7%)	116 (33.7%)	81 (31.6%)	108 (41.4%)	73 (32.0%)	0.070
Drugs
ACEI ARB	305 (28.0%)	98 (28.5%)	100 (39.1%)	68 (26.1%)	39 (17.1%)	<.001
Beta Blocker	868 (79.7%)	275 (79.9%)	218 (85.2%)	191 (73.2%)	184 (80.7%)	0.008
Furosemide	987 (90.6%)	327 (95.1%)	246 (96.1%)	217 (83.1%)	197 (86.4%)	<.001
Spironolactone	93 (8.5%)	40 (11.6%)	19 (7.4%)	15 (5.8%)	19 (8.3%)	0.065
Dobutamine	44 (4.0%)	12 (3.5%)	11 (4.3%)	7 (2.7%)	14 (6.1%)	0.246
Dopamine	96 (8.8%)	24 (7.0%)	21 (8.2%)	28 (10.7%)	23 (10.1%)	0.360
Epinephrine	132 (12.1%)	20 (5.8%)	57 (22.3%)	13 (5.0%)	42 (18.4%)	<.001
Norepinephrine	452 (41.5%)	89 (25.9%)	94 (36.7%)	112 (42.9%)	157 (68.9%)	<.001
Phenylephrine	441 (40.5%)	81 (23.6%)	141 (55.1%)	89 (34.1%)	130 (57.0%)	<.001
Other indicators
Ventilation	1062 (97.5%)	339 (98.6%)	251 (98.1%)	248 (95.0%)	224 (98.3%)	0.029
CRRT	101 (9.3%)	11 (3.2%)	4 (1.6%)	40 (15.3%)	46 (20.2%)	<.001
Sepsis	855 (78.5%)	258 (75.0%)	178 (69.5%)	214 (82.0)	205 (90.0)	<.001
AKI	1044 (95.9%)	321 (93.3%)	244 (95.3%)	259 (99.2%)	220 (96.5%)	0.004
SOFA	6.0 (4.0, 9.0)	5.0 (3.0,7.0)	6.0 (4.0,9.0)	6.0 (4.0,9.0)	8.0 (4.0,10.0)	<.001
Charlson	7.00 (5.0, 8.0)	7.00 (5.0,8.0)	6.00 (5.0,8.0)	7.00 (5.0,9.0)	6.00 (5.0,8.0)	0.056
Abbreviation: T:Temperature，HR:Heart Rate，RR:Respiratory Rate，SBP:Systolic Blood Pressure，SpO₂:Peripheral Capillary Oxygen Saturation，WBC:White Blood Cell，PLT:Platelet，Hb:Hemoglobin，RDW:Red Cell Distribution Width，Na:Sodium，K:Potassium，Ca:Calcium，GLU:Glucose，AG:Anion Gap，Cr:Creatinine，PT:Prothrombin Time，APTT:Activated Partial Thromboplastin Time，pH:Hydrogen Ion Concentration，PaCO₂:Partial Pressu…
